# Supplementary material
Source: MDPI journal article supplement (https://www.mdpi.com/2073-4395/12/1/210)
Supplement: s1 [file s1]

## Supplementary Materials

**Table S1.** Crop emergence and durum wheat spike number and spike biomass at harvest as affected by intercropping density and year.

| Year             | Intercropping system | Crop emergence (plants m <sup>-2</sup> ) |                | Durum wheat spike productivity         |                                    |
|------------------|----------------------|------------------------------------------|----------------|----------------------------------------|------------------------------------|
|                  |                      | Lentil                                   | Durum wheat    | Spike number (spikes m <sup>-2</sup> ) | Spike biomass (g m <sup>-2</sup> ) |
| 2019             | Weeded sole crop     | -                                        | -              | -                                      | -                                  |
|                  | Sole crop            | 173.1(13.0) aA                           | 305.6(15.0) aA | 402.1(20.5) aA                         | 730.8(37.5) aA                     |
|                  | 100% Mix             | 211.2(16.8) aA                           | 288.0(15.8) aA | 363.7(11.9) aA                         | 637.4(21.0) aA                     |
|                  | 33% Mix              | 200.8(16.9) aA                           | 119.4(7.9) bA  | 290.5(12.2) bA                         | 629.5(23.4) aA                     |
| 2020             | Weeded sole crop     | 209.7(20.5) aA                           | -              | -                                      | -                                  |
|                  | Sole crop            | 225.2(21.6) aA                           | 322.3(17.5) aA | 296.0(13.0) aB                         | 365.0(16.3) aB                     |
|                  | 100% Mix             | 183.7(25.2) aA                           | 312.5(10.0) aA | 215.8(11.1) bB                         | 253.7(21.8) bB                     |
|                  | 33% Mix              | 194.9(25.1) aA                           | 127.4(8.7) bA  | 171.1(12.5) cB                         | 228.0(14.3) bC                     |
| 2021             | Weeded sole crop     | 148.5(4.6) bB                            | -              | -                                      | -                                  |
|                  | Sole crop            | 216.1(7.5) aA                            | 142.3(17.7) aB | 193.1(11.6) abC                        | 318.1(20.8) aB                     |
|                  | 100% Mix             | 218.1(9.0) aA                            | 153.9(12.1) aB | 203.0(12.9) aB                         | 304.1(24.5) aB                     |
|                  | 33% Mix              | 211.1(8.7) aA                            | 63.9(5.9) bB   | 154.3(9.0) bB                          | 302.5(20.0) aB                     |
| <i>P</i> -values | Intercropping        | 0.383                                    | <0.0001        | <0.0001                                | <0.0001                            |
|                  | Year                 | 0.597                                    | <0.0001        | <0.0001                                | <0.0001                            |
|                  | Int. x Year          | 0.02                                     | 0.852          | 0.0052                                 | 0.023                              |

Values are treatment means (S.E); different lowercase letters within columns in each year indicate statistical significance at  $p \leq 0.05$  level (Tukey's post-hoc test) among treatments. Different uppercase letters within columns indicate statistically significant differences between years.
